# Supplementary material
Source: PubMed Central journal article supplement (PMC1885490)

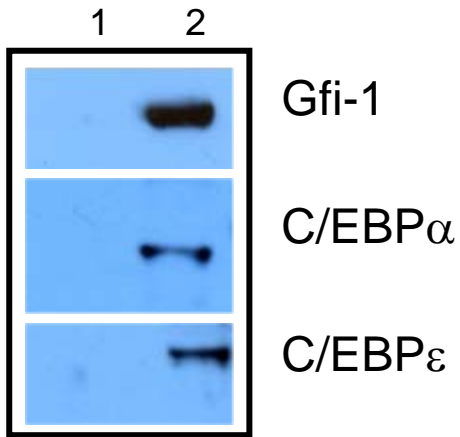

Probe: CDP/cut site in LF promoter (non-specific probe)

Supplement: blood_blood-2005-05-022004_1.pdf [file blood_blood-2005-05-022004_1.pdf]
